# Supplementary material for: Antiparasitic Activity of Plumbago auriculata Extracts and Its Naphthoquinone Plumbagin against Trypanosoma cruzi
Source: MDPI journal article supplement (doi:10.3390/pharmaceutics15051535), 2023-05-19
Supplement: s1 [file s1]

## Supplementary methods for: (Suppl S1)

### Plumbagin structure

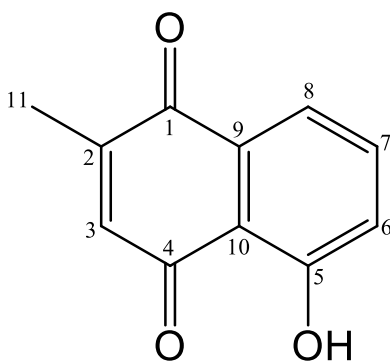

**Figure S1:** Plumbagin structure

## NMR Spectroscopy

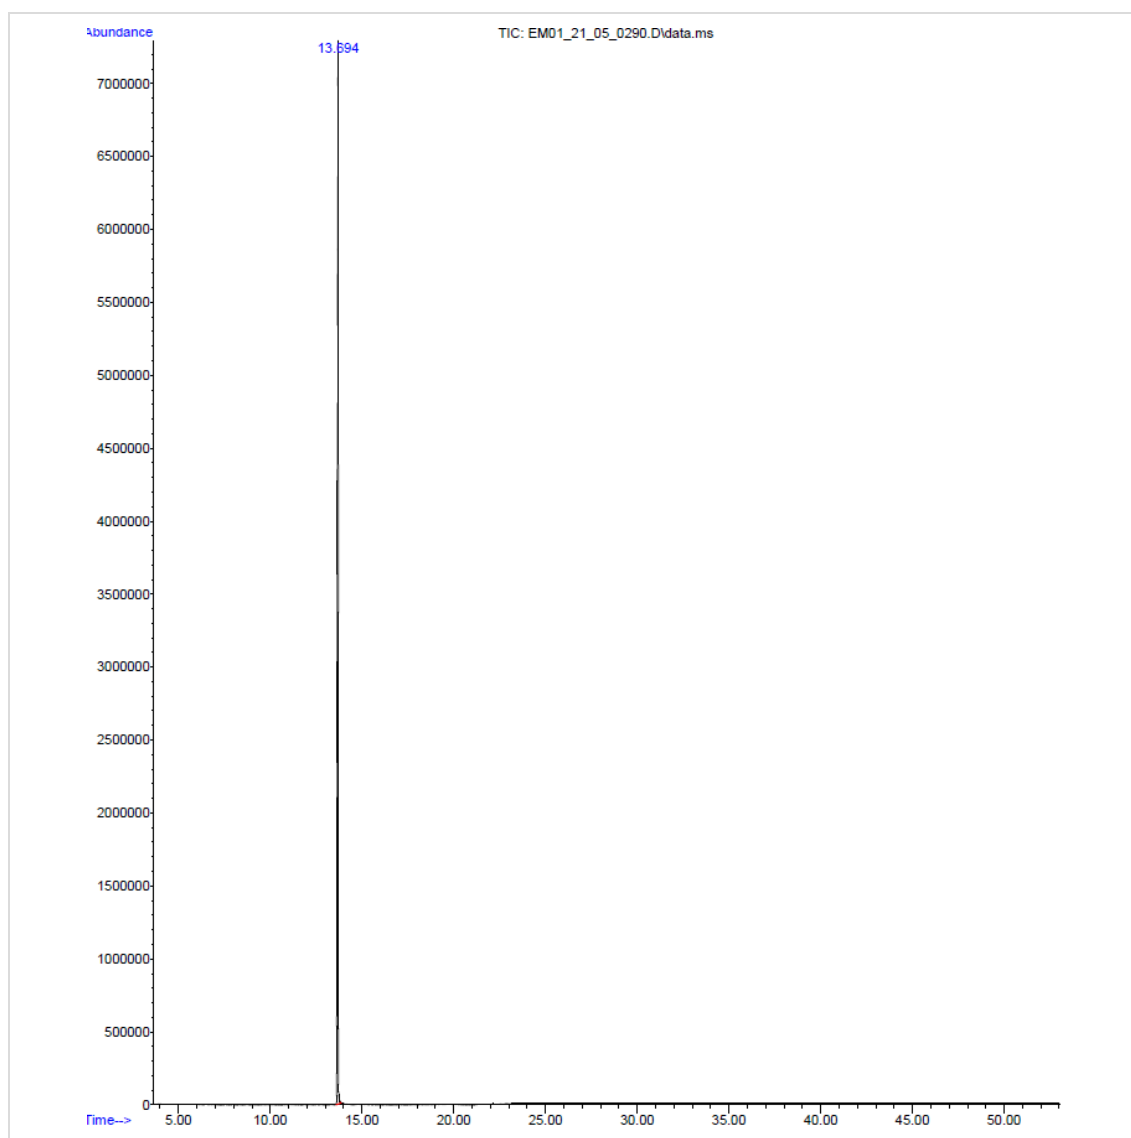

**Figure S2:** GC-MS for Plumbagin

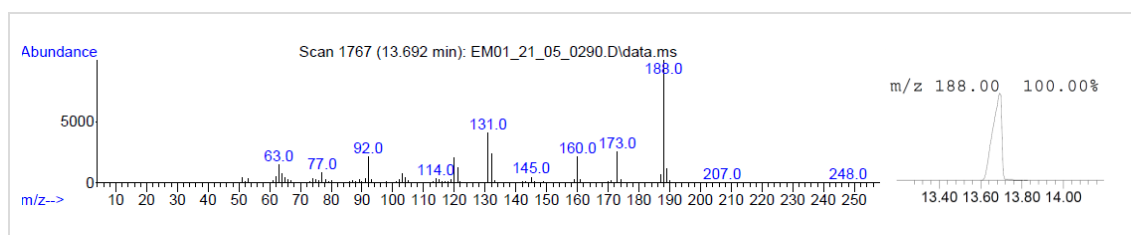

**Figure S3:** GC-MS for Plumbagin (CG-EM  $m/z$  188  $[M]^+$  (100), 131 (41), 173  $[M - CH_3]$  (25), 132 (24), 160 (21)).

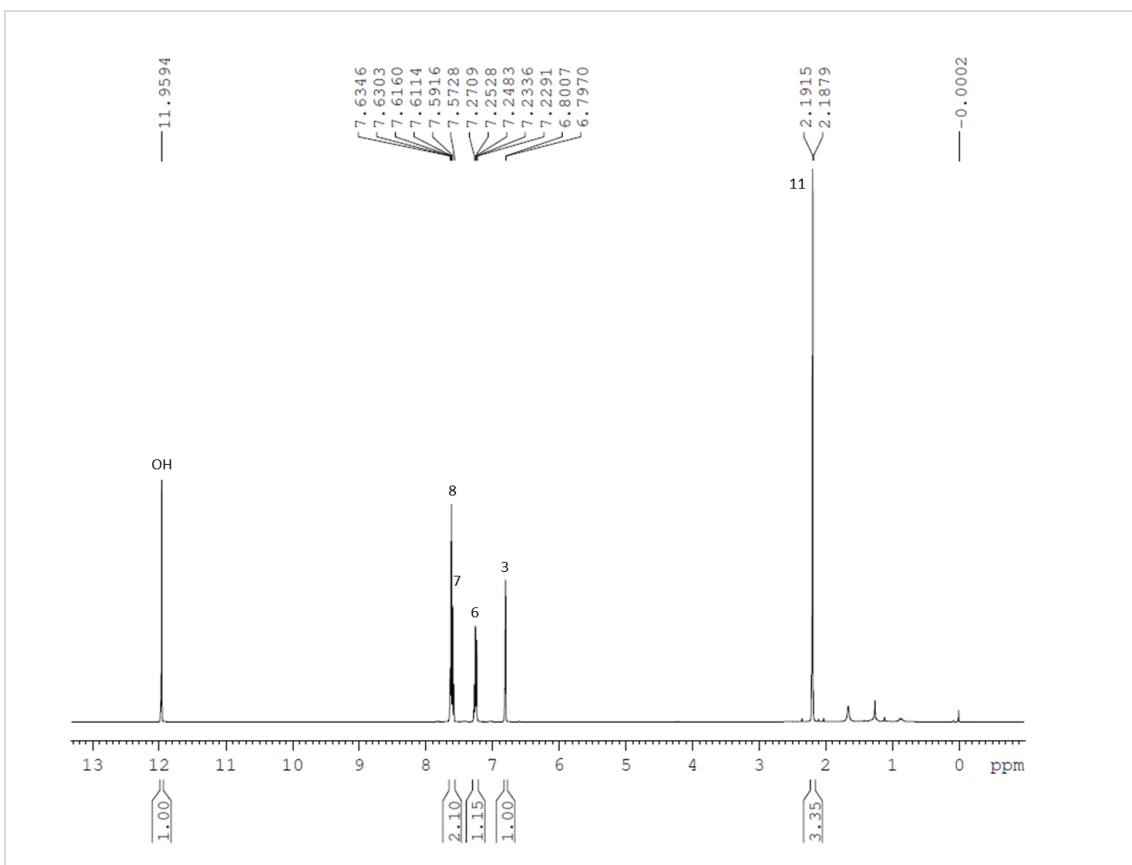

**Figure S4:** <sup>1</sup>H NMR spectrum for Plumbagin

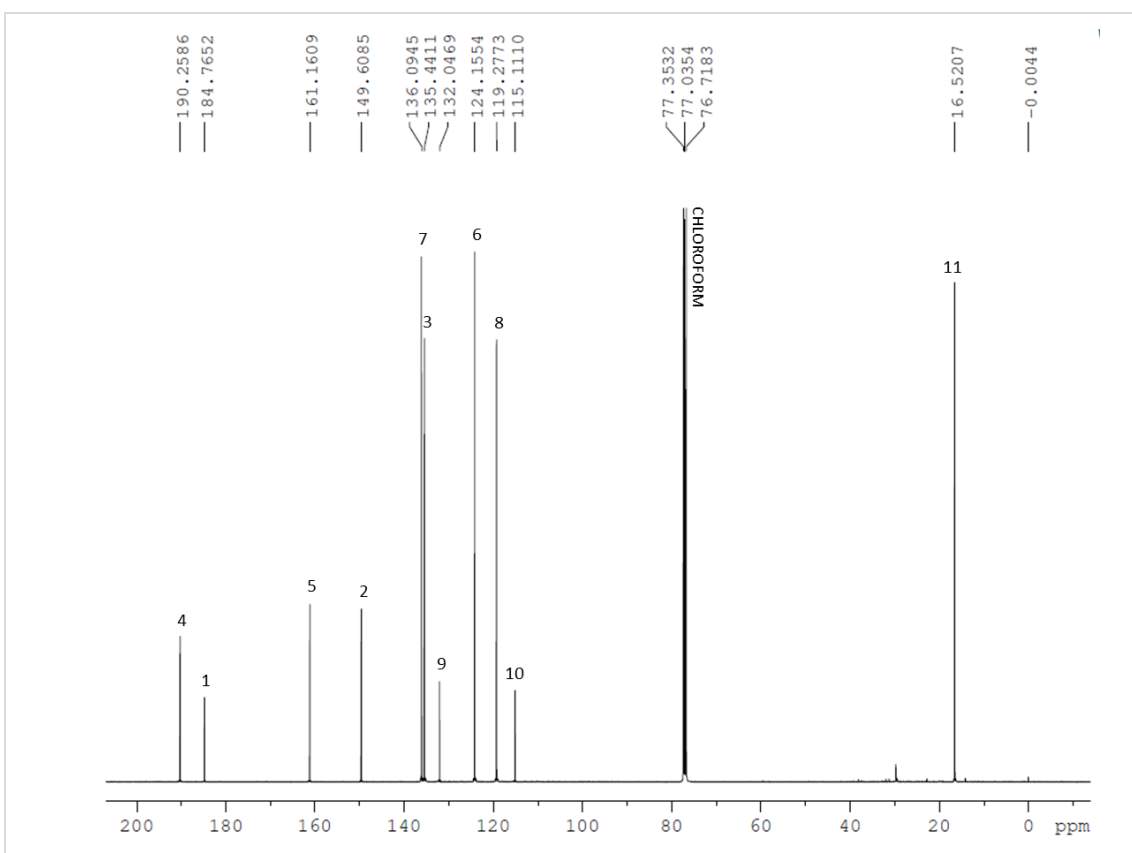

**Figure S5:** <sup>13</sup>C NMR spectrum for Plumbagin

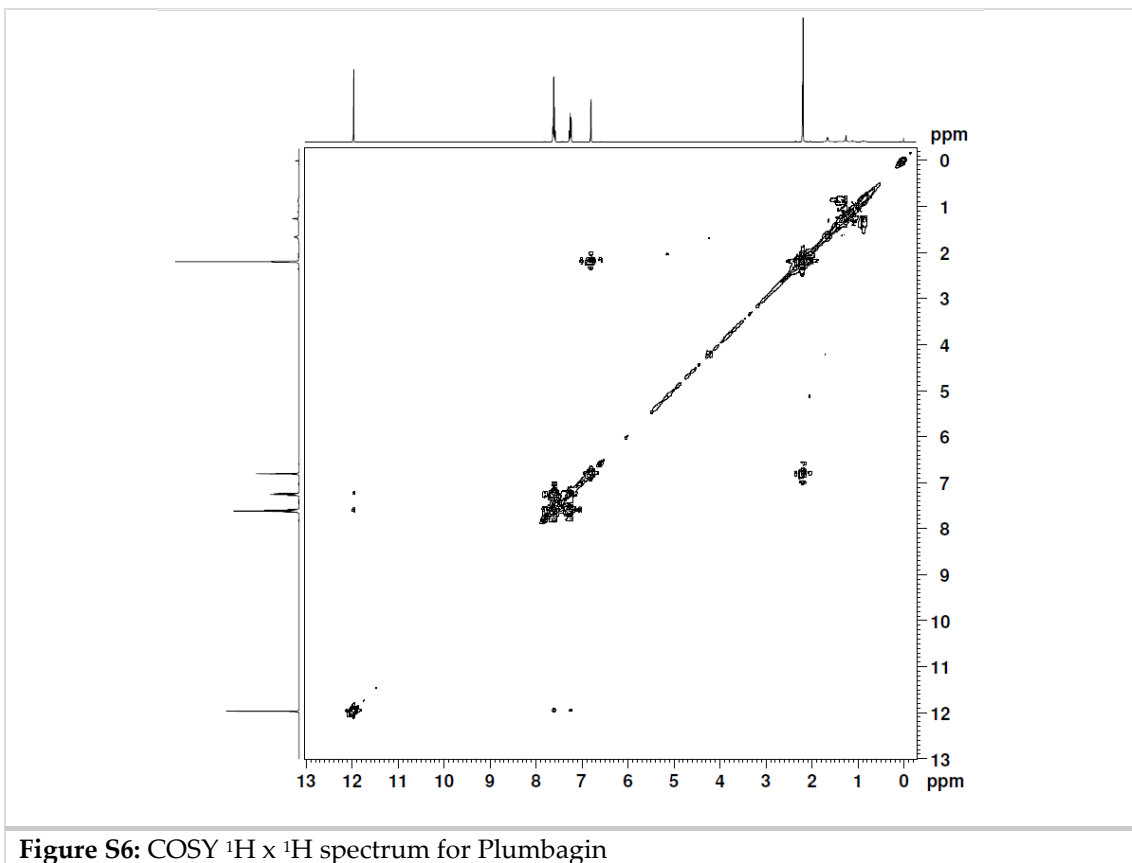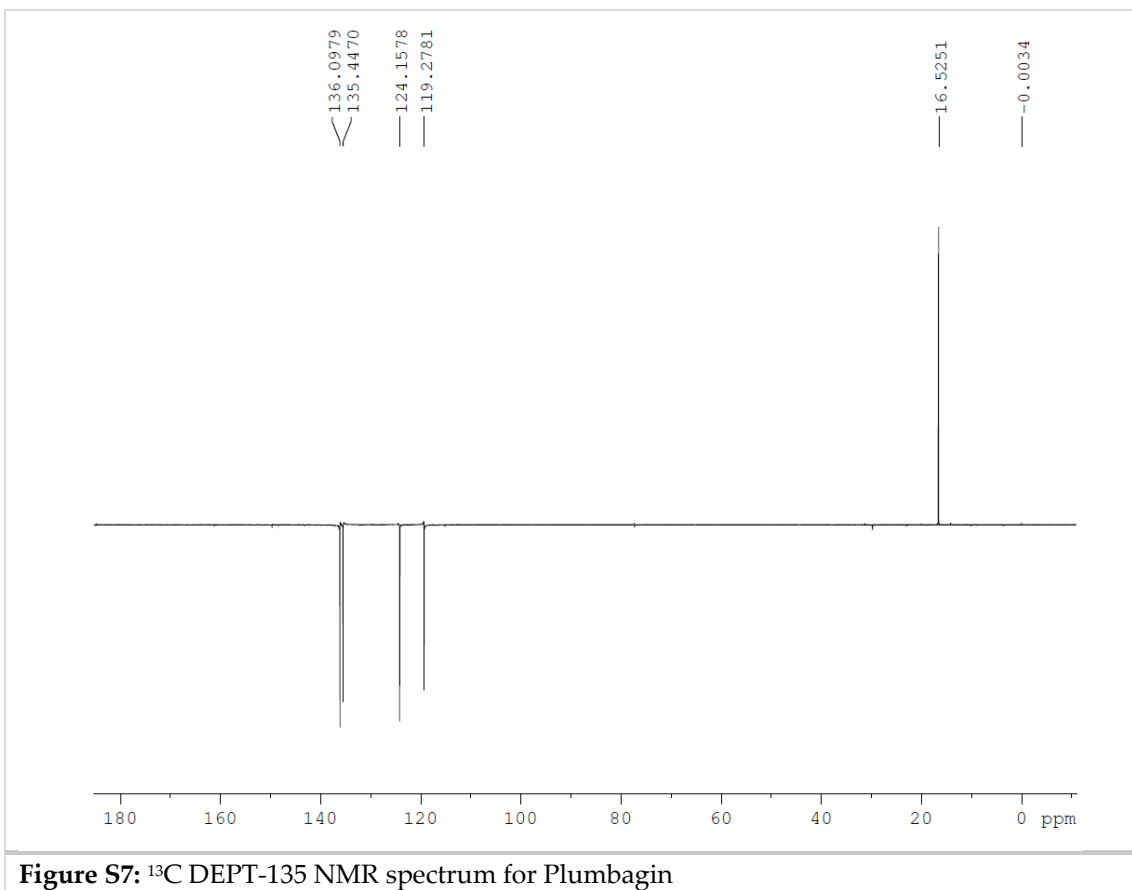

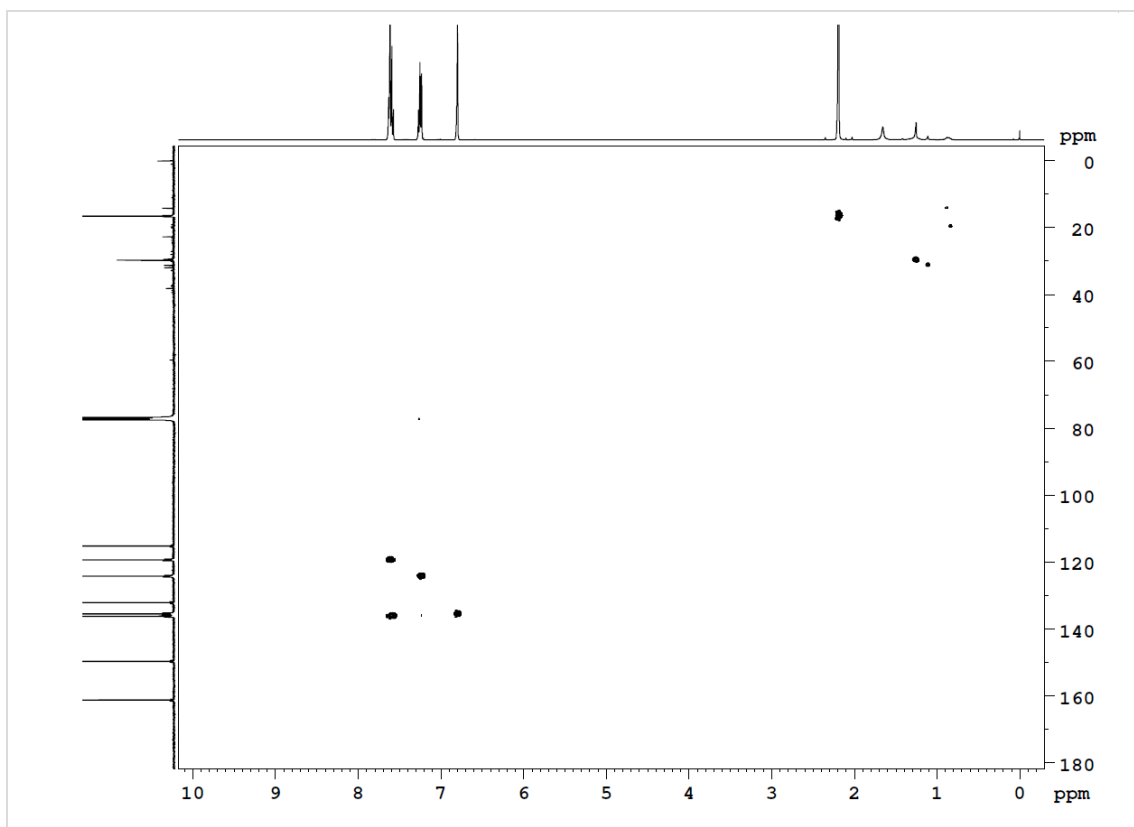

**Figure S8:** HSQC  $^1\text{H} \times ^{13}\text{C}$  spectrum for Plumbagin

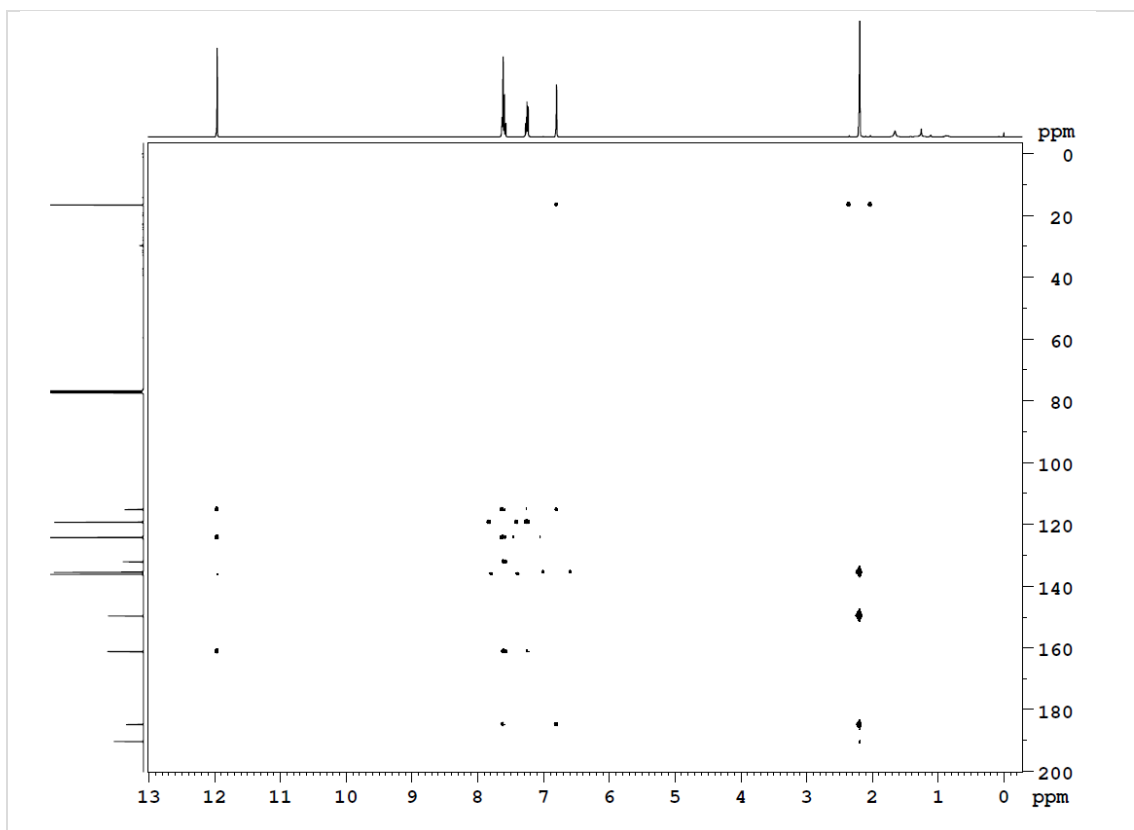

**Figure S9:**  $^1\text{H} \times ^{13}\text{C}$ -HMBC spectrum for Plumbagin

**Table S1:** NMR data of the isolated plumbagin

| Position | The isolated plumbagin <sup>a</sup>                                                 |                     | The reported plumbagin <sup>a</sup> |                     | The reported plumbagin <sup>a</sup>  |                     |
|----------|-------------------------------------------------------------------------------------|---------------------|-------------------------------------|---------------------|--------------------------------------|---------------------|
|          | <sup>1</sup> H NMR                                                                  | <sup>13</sup> C NMR | <sup>1</sup> H NMR                  | <sup>13</sup> C NMR | <sup>1</sup> H NMR                   | <sup>13</sup> C NMR |
| 1        |                                                                                     | 184.4               |                                     | 184.7               |                                      | 184.7               |
| 2        |                                                                                     | 149.6               |                                     | 149.5               |                                      | 149.6               |
| 3        | 6.80 ( <i>d</i> , H3;<br><i>J</i> =1.48)                                            | 135.4               | 6.8 ( <i>d</i> , H3)                | 135.4               | 6.7 ( <i>s</i> , H-3)                | 136.0               |
| 4        |                                                                                     | 190.2               |                                     | 190.2               |                                      | 190.2               |
| 5        |                                                                                     | 161.1               |                                     | 161.1               |                                      | 161.1               |
| 6        | 7.24 ( <i>dd</i> , H6;<br><i>J</i> <sub>1</sub> =7.68, <i>J</i> <sub>2</sub> =1.80) | 124.1               | 7.23 ( <i>m</i> , H6)               | 124.1               | 7.22 – 7.20 ( <i>m</i> ,<br>H-6)     | 124.1               |
| 7        | 7.59 ( <i>t</i> , H7;<br><i>J</i> =7.52)                                            | 136.0               | 7.60 ( <i>m</i> , H7)               | 136.0               | 7.59 ( <i>m</i> , H7)                | 135.4               |
| 8        | 7.62 ( <i>dd</i> , H8;<br><i>J</i> <sub>1</sub> =7.56, <i>J</i> <sub>2</sub> =1.72) | 119.2               | 7.60 ( <i>m</i> , H8)               | 119.0               | 7.55 ( <i>m</i> , H8)                | 119.2               |
| 9        |                                                                                     | 132.0               |                                     | 132.0               |                                      | 132.0               |
| 10       |                                                                                     | 115.1               |                                     | 115.0               |                                      | 115.2               |
| 11       | 2.19 ( <i>d</i> , CH <sub>3</sub> ; <i>J</i> =<br>1.44)                             | 16.5                | 2.18 ( <i>d</i> , H11)              | 16.5                | 2.16 ( <i>s</i> , -CH <sub>3</sub> ) | 16.1                |
| -OH      | 11.96 ( <i>s</i> , OH)                                                              |                     | 11.95                               |                     | 11.94 ( <i>brs</i> , -<br>OH)        |                     |

<sup>a</sup> Measured in CDCl<sub>3</sub>
